# Supplementary material for: Fluorescence-enhancing plasmonic silver nanostructures using azopolymer lithography
Source: Royal Society of Chemistry journal article supplement (doi:10.1039/c6ra04202c), 2016-01-01
Supplement: c6ra04202c1.pdf [file c6ra04202c1.pdf]

## Supporting Material

### **Fluorescence-enhancing plasmonic silver nanostructures using azopolymer lithography**

Ville Pale,<sup>1, a)</sup> Christoffer Kauppinen, Jorma Selin, Markku Söpanen, and Ilkka Tittonen

<sup>1</sup> Department of Micro and Nanosciences, Aalto University, P.O. Box 13500, FI-00076 Aalto, Finland

|   |                                                           |   |
|---|-----------------------------------------------------------|---|
| 1 | Statistical analysis of the SEM images .....              | 2 |
| 2 | The AFM data.....                                         | 3 |
| 3 | Statistical analysis of the confocal microscopy data..... | 4 |

## 1 Statistical analysis of the SEM images

The SEM images (Fig. S1(a) and Fig. S2(a)) were analyzed using ImageJ<sup>1</sup> software to obtain information about the average size and the diameter of the particles. The analysis was performed using color-based thresholding, which separates the particles from the surface based on the contrast difference (Fig. S1(b) and Fig. S2(b)). From this data the software calculated the areas for each particle. This data was used to determine the diameter for a particle as well as to calculate the standard-deviation for the particle diameter. The diameter histograms are shown in Fig. S1(c) and Fig. S2(c).

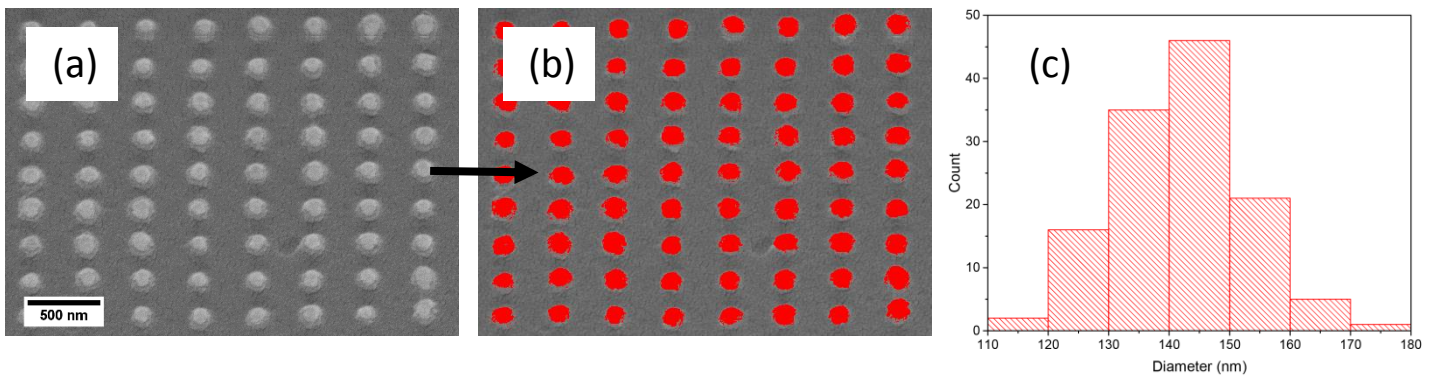

Fig S1. (a) The original SEM image, (b) contrast based thresholding of the silver nanoparticles and (c) particle diameter histograms obtained from the SEM data for  $\Lambda=370$  nm grating.

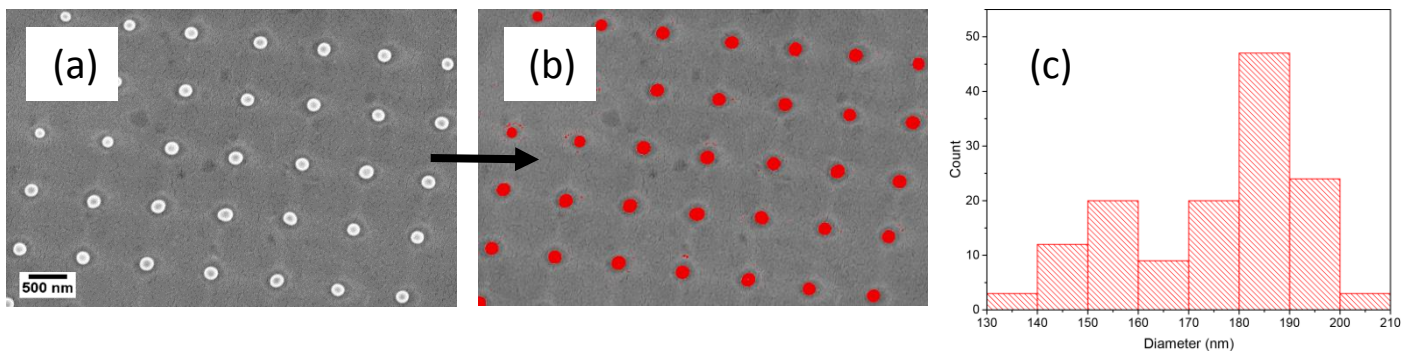

Fig S2. (a) The original SEM image, (b) contrast based thresholding of the silver nanoparticles and (c) particle diameter histograms obtained from the SEM data for  $\Lambda=1$   $\mu$ m grating.

[1] ImageJ – <http://imagej.nih.gov/ij/>

## 2 The AFM data

The AFM height data was taken from Figure S2 (a) and (b) and analyzed using the Nanoscope Analysis (Bruker) software.

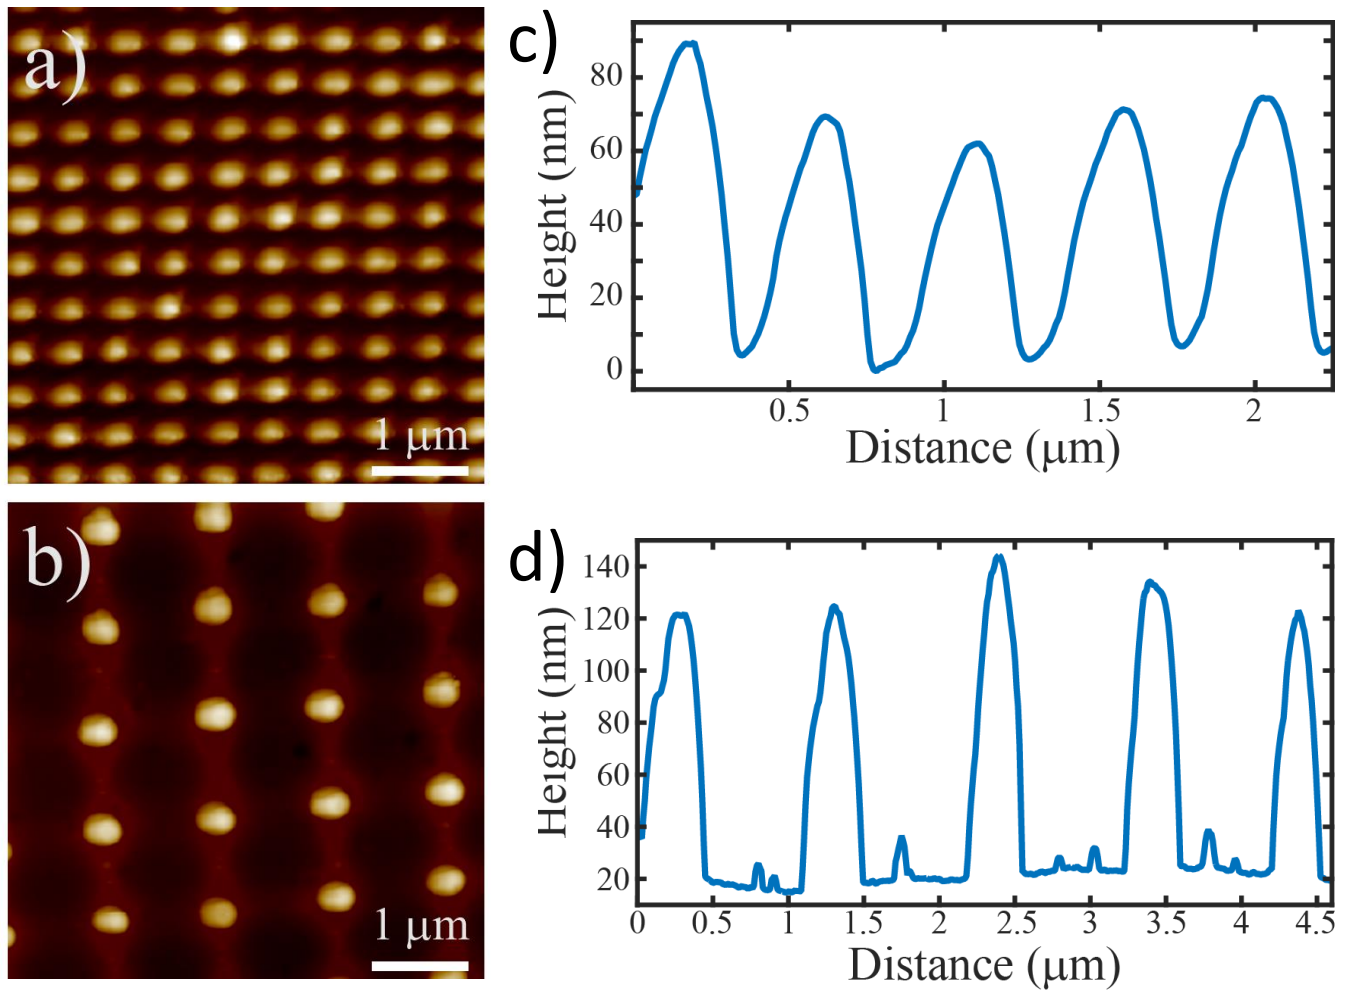

Fig S2. The measured AFM data for (a)  $\Lambda = 370$  nm and (b)  $\Lambda = 1$   $\mu\text{m}$  samples after the ALD  $\text{Al}_2\text{O}_3$  deposition. The corresponding height topography images for (c)  $\Lambda = 370$  nm and (d)  $\Lambda = 1$   $\mu\text{m}$  gratings.

### 3 Statistical analysis of the confocal microscopy data

The image statistics were obtained using the Witec Project software that is incorporated within the microscope. The actual enhancement factors were calculated using the obtained averages for each image as in  $EF = Ave/Ave_{ref}$ .

**Table 1. Image statistics for Fig. 4 (a) glass substrate coated with R6G**

| <b>Parameter</b>   | <b>Value</b>           |
|--------------------|------------------------|
| Number of pixels   | 80000                  |
| Area               | 250000 $\mu\text{m}^2$ |
| Average            | 203.8 kHz              |
| Standard Deviation | 25.2 kHz               |
| Min                | 128.9 kHz              |
| Max                | 803.3 kHz              |

**Table 2. Image statistics for Fig. 4 (b) 2D nanoparticle array ( $\Lambda=370$  nm) coated with R6G**

| <b>Parameter</b>   | <b>Value</b>           |
|--------------------|------------------------|
| Number of pixels   | 80000                  |
| Area               | 250000 $\mu\text{m}^2$ |
| Average            | 1167.7 kHz             |
| Standard Deviation | 49.5 kHz               |
| Min                | 1000.2 kHz             |
| Max                | 1328.7 kHz             |

**Table 3. Image statistics for Fig. 4 (d) glass substrate coated with CB**

| <b>Parameter</b>   | <b>Value</b>          |
|--------------------|-----------------------|
| Number of pixels   | 65536                 |
| Area               | 62500 $\mu\text{m}^2$ |
| Average            | 9.2 kHz               |
| Standard Deviation | 1.3 kHz               |
| Min                | 4.5 kHz               |
| Max                | 15.3 kHz              |

**Table 4. Image statistics for Fig. 4 (e) 2D nanoparticle ( $\Lambda=1$   $\mu\text{m}$ ) array coated with CB**

| <b>Parameter</b>   | <b>Value</b>          |
|--------------------|-----------------------|
| Number of pixels   | 65536                 |
| Area               | 62500 $\mu\text{m}^2$ |
| Average            | 15.4 kHz              |
| Standard Deviation | 1.9 kHz               |
| Min                | 11.5 kHz              |
| Max                | 19 kHz                |
